# Supplementary material for: Controlled release of hydrogen by implantation of magnesium induces P53-mediated tumor cells apoptosis
Source: PubMed Central journal article supplement — Bioact Mater. 2021 Aug 9;9:385–96. doi: 10.1016/j.bioactmat.2021.07.026 (PMC8586587; doi:10.1016/j.bioactmat.2021.07.026), 2021-08-09
Supplement: mmc1.pdf [file mmc1.pdf]

## Supplementary Files

### **Controlled Release of Hydrogen by Implantation of Magnesium Induces P53-mediated Tumor Cells Apoptosis**

Rui Zan<sup>a, b#</sup>, Hao Wang<sup>c#</sup>, Weijie Cai<sup>d#</sup>, Jiahua Ni<sup>a\*</sup>, Bérengère J. C. Luthringer-Feyerabend<sup>b</sup>, Wenhui Wang<sup>a</sup>, Hongzhou Peng<sup>a</sup>, Weiping Ji<sup>d</sup>, Jun Yan<sup>e</sup>, Jiazeng Xia<sup>c\*</sup>, Yang Song<sup>a\*</sup>, Xiaonong Zhang<sup>a, f\*</sup>

<sup>a</sup> State Key Laboratory of Metal Matrix Composites, School of Materials Science and Engineering, Shanghai Jiao Tong University, Shanghai 200240, China

<sup>b</sup> Institute of Metallic Biomaterials, Department of Biological Characterisation, Helmholtz-Zentrum Geesthacht (HZG), Geesthacht 21502, Germany

<sup>c</sup> Department of General Surgery and Translational Medicine Center, Wuxi No.2 People's Hospital, Affiliated Wuxi Clinical College of Nantong University, Jiangsu 214002, China

<sup>d</sup> Orthopaedic Department, Shanghai Jiao Tong University Affiliated Sixth People's Hospital, Shanghai 200233, China

<sup>e</sup> Department of General Surgery, Shanghai Jiao Tong University Affiliated Sixth People's Hospital, Shanghai 200233, China

<sup>f</sup> Suzhou Origin Medical Technology Co. Ltd., Suzhou 215513, China

<sup>#</sup> **Authors contributed equally to this work.**

**Corresponding authors:** nijiahua2012@gmail.com (Dr. J. Ni);

jiazengxia@yahoo.com (Dr. J. Xia);

nanosurface@sjtu.edu.cn (Dr. Y. Song);

xnzhang@sjtu.edu.cn (Dr. X. Zhang).

## **Materials and methods**

**The H<sub>2</sub> evolution in cell culture.** H<sub>2</sub> collection devices were used in cell culture experiments with an atmosphere of 5% CO<sub>2</sub> at 37 °C. After 48 h in the cell incubator, the volume of released H<sub>2</sub> in different groups was quantitatively measured by the weight loss of Mg sheets. Before weighting, the corroded samples were rinsed in an aqueous solution containing 180 g/L CrO<sub>3</sub>, and 10 g/L AgNO<sub>3</sub>. A loss of 1.083 mg of Mg produced 1mL H<sub>2</sub> [1]. Besides, the surface morphology and roughness of the Mg sheets after immersion in PBS were observed using scanning electron microscopy (FEI, USA) and confocal laser scanning microscopy (CLSM, Zeiss, German). In the meantime, the concentration of dissolved H<sub>2</sub> in culture medium was measured by a dissolved hydrogen analyzer.

**Detection of intracellular ROS content.** The intracellular ROS level was tested by exposing tumor and normal cells to H<sub>2</sub> for 48 h. Then, cells were collected by trypsin digestion and stained by 2,7-Dichlorodi-hydrofluorescein diacetate (DCFH-DA) ROS-sensitive probe (YEASEN, China). The intracellular ROS content was quantitatively analyzed by a flow cytometer after washed twice by culture medium without FBS.

**Detection of oxidative stress and antioxidant enzymes.** The contents of MDA and SOD in tumor cells were measured by using kits purchased from Jiancheng Biotechnology Research Institute (Nanjing, China). The operation procedure was according to the manufacturer's protocol.

**Detection of ATP.** The concentration of ATP in tumor cells was tested by the Luminescence ATP Detection Assay System (PerkinElmer, USA). The HCT116 cells

were seeded in the H<sub>2</sub>-producing device and treated with different amounts of H<sub>2</sub>. After 48 h, the cells were transferred to a 96-well plate, added with 100 µL ATP detection agent and then shaken for 3 min. The luminescence of cells was measured by a multimode microplate reader (Tecan & Spark, Switzerland).

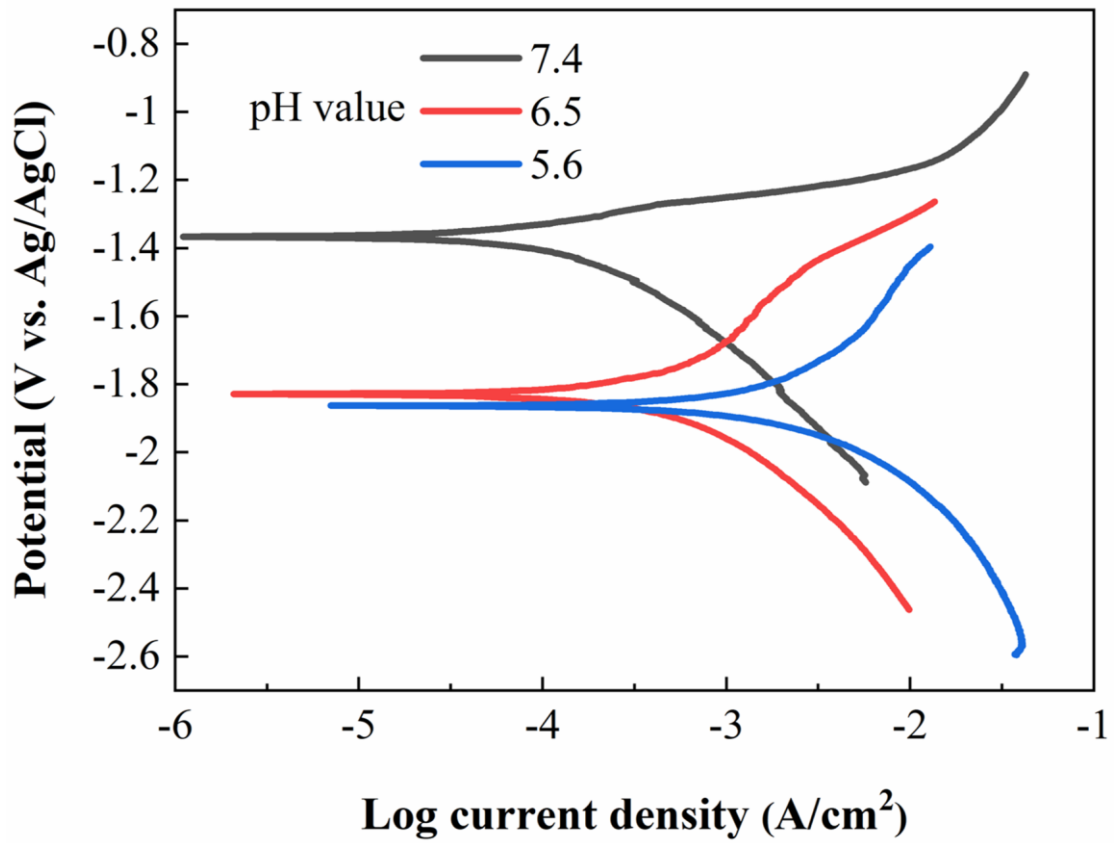

Figure S1 Typical cathodic potentiodynamic polarization curves for Mg sheet in different pH values of PBS solution.

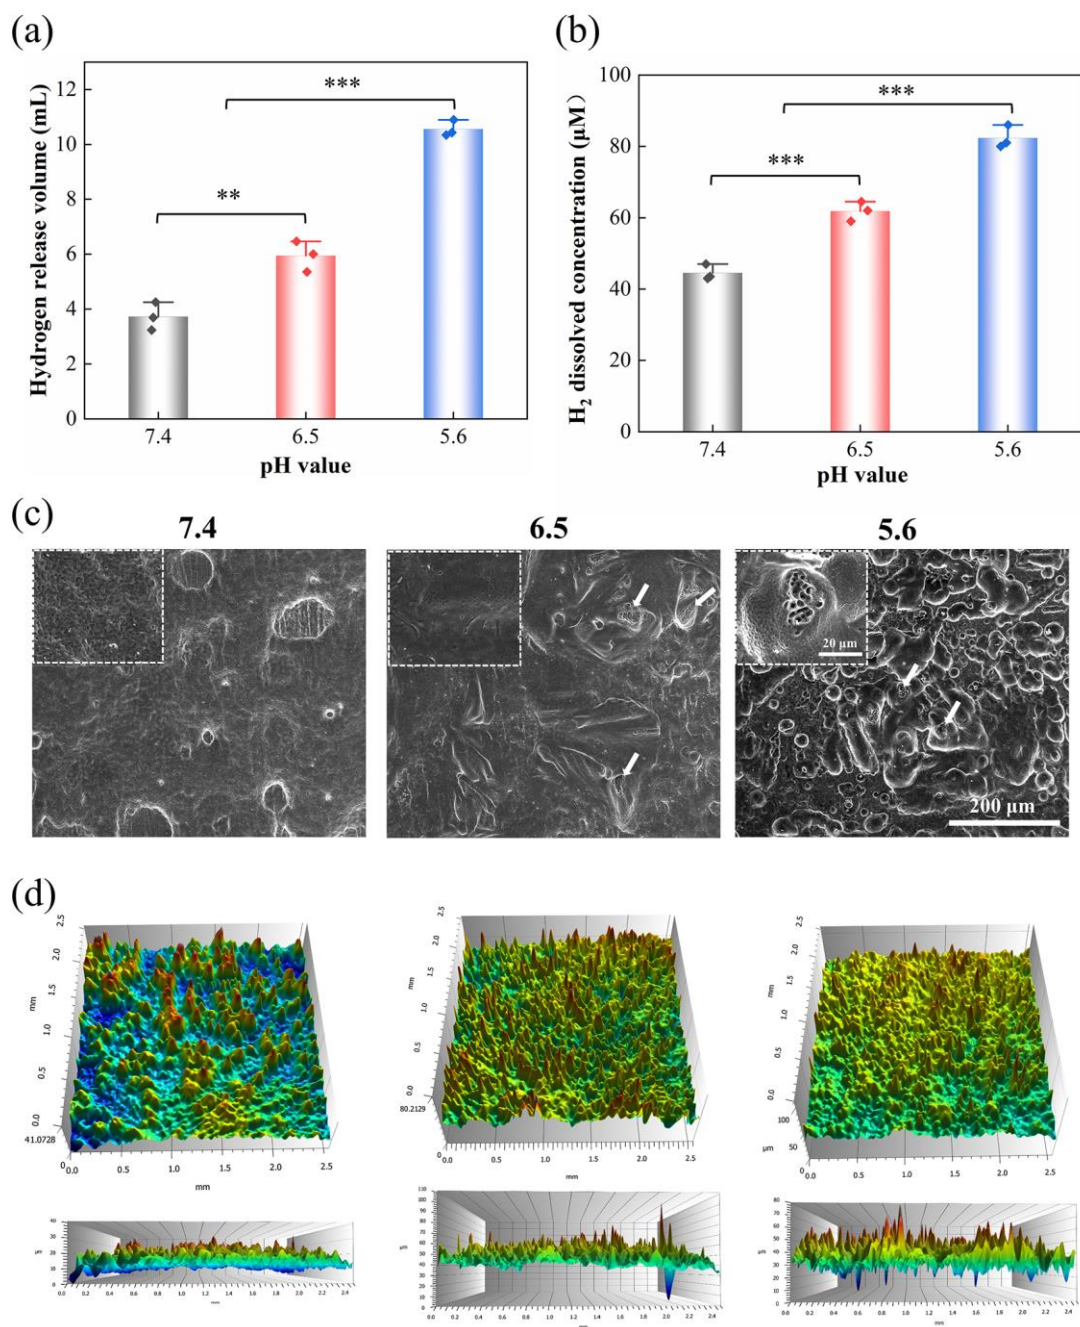

Figure S2 (a) The release volume of H<sub>2</sub> when Mg samples immersed in PBS solution with different pH values for 48 h in a cell incubator. (b) The corresponding concentration of dissolved H<sub>2</sub> in culture medium in the upper transwell chamber. The SEM (c) and CLSM (d) images of Mg samples immersed in PBS solution with different pH values for 48 h in cell incubator after corrosion layer removing.

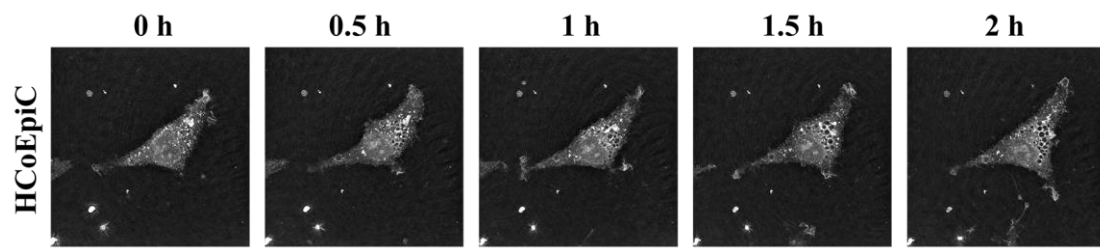

Figure S3 A series of morphology images of HCT116 cells from a live cell imaging microscope.

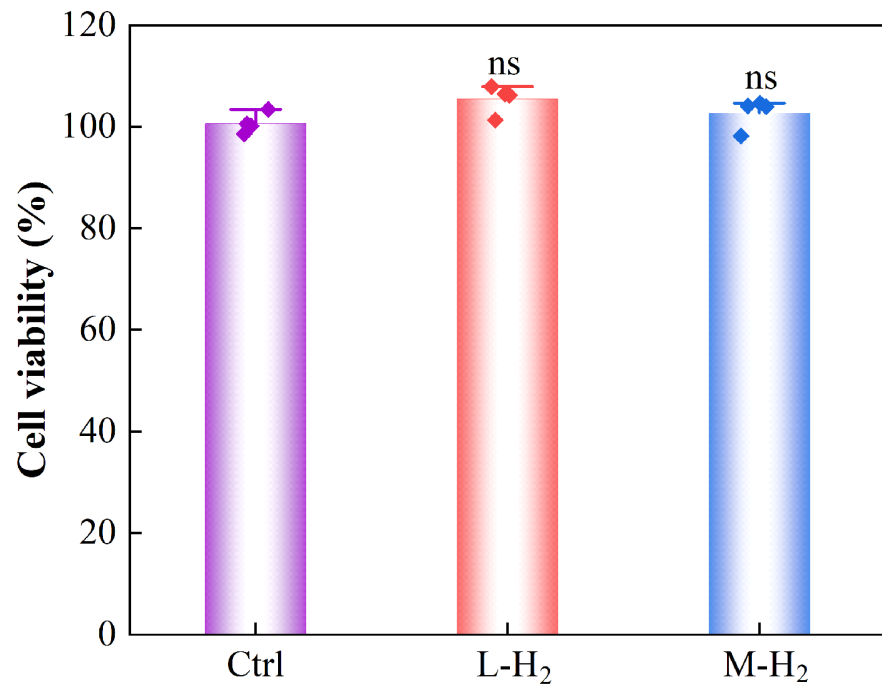

Figure S4 The cell viability of human colonic epithelial cells (HCoEpiC) with different treatments for 72 h.

The differences of hydrogen to the viability of tumor and normal tissue cells may be explained by the selective scavenging activity of H<sub>2</sub> against redundant cytotoxic ROS in tumor cells, but not affect the role of essential ROS metabolites in normal cells, as shown in Fig. S5. Besides, the released H<sub>2</sub> reduced the oxidative stress in tumor cells by alleviating the level of oxidative protein malondialdehyde (MDA) and increasing antioxidant enzyme superoxide dismutase (SOD) activity (Fig. S6).

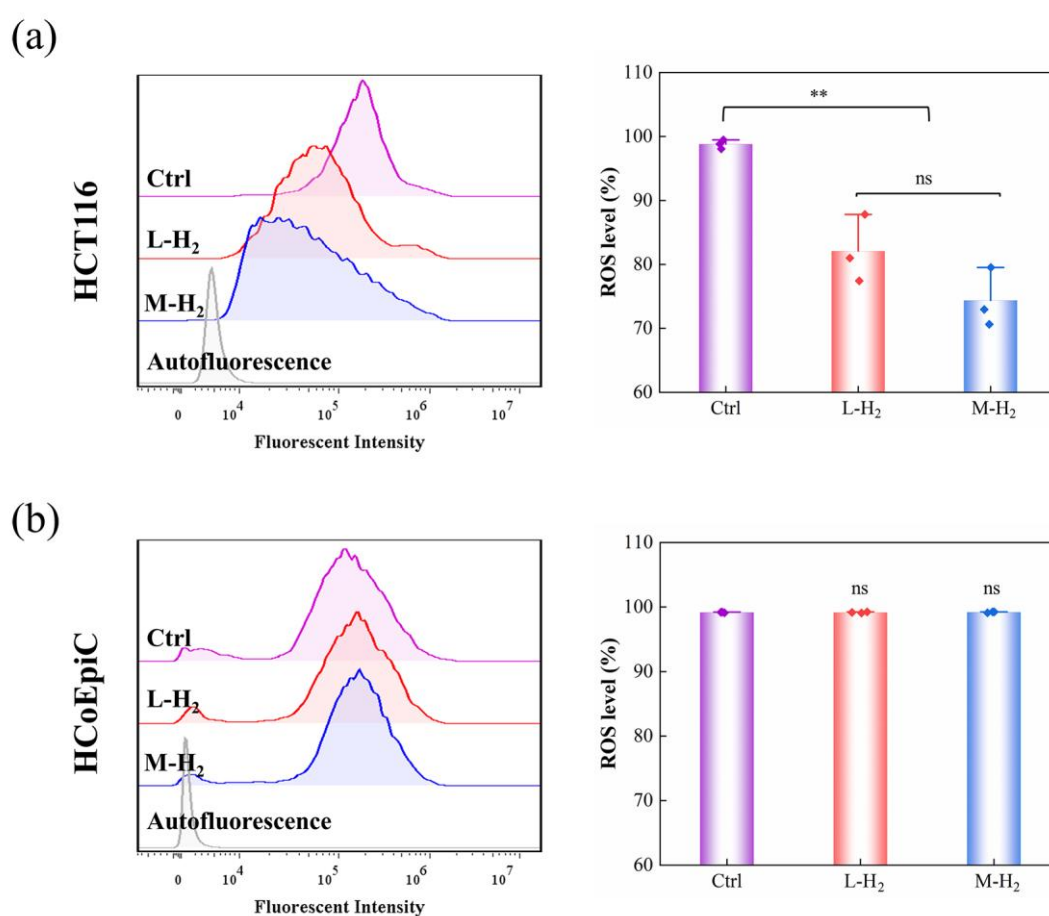

Figure S5 The intracellular reactive oxygen species (ROS) level and the relatively quantitative analysis in HCT116 (a) and HCoEpiC (b) cells with different treatments for 48 h.



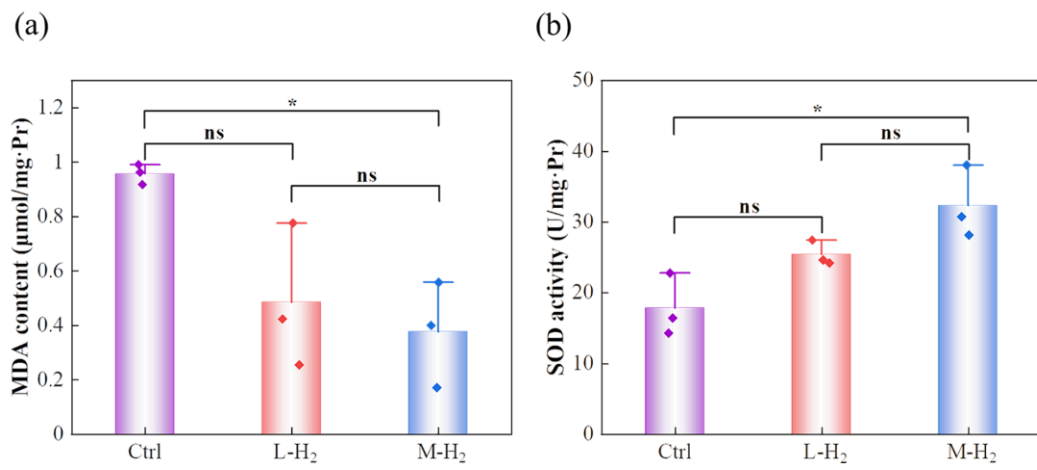

Figure S6 The MDA level (a) and SOD activity in HCT116 cells with different treatments for 48 h.

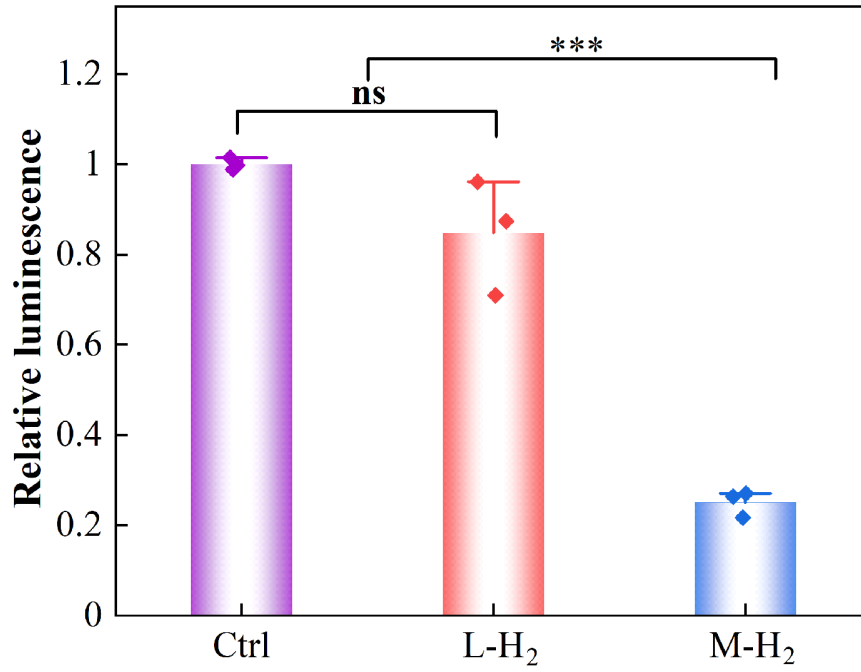

Figure S7 The ATP content in HCT116 cells with different treatments by luminescence ATP Detection Assay.

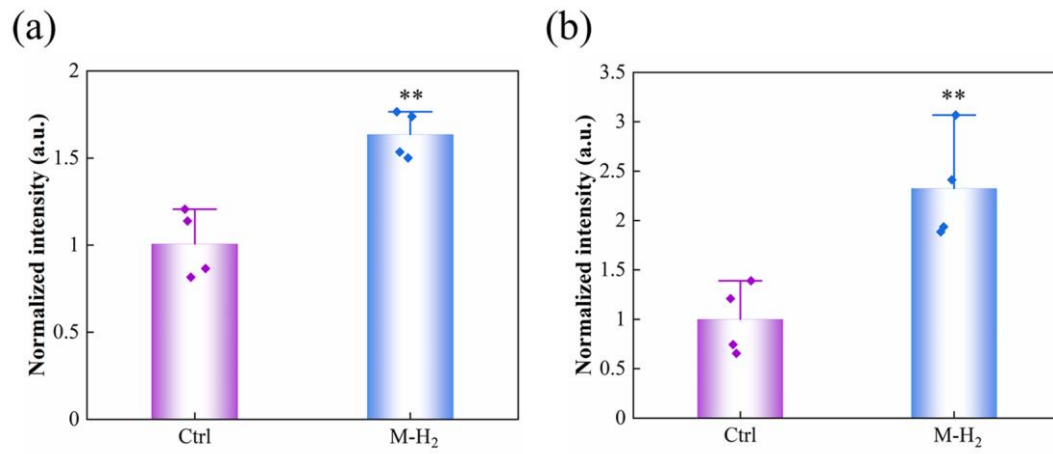

Figure S8 The quantification of cytochrome C (a) and caspase 3 (b) fluorescent intensity from the confocal fluorescence images of HCT116 cells in the Ctrl and M-H<sub>2</sub> groups.

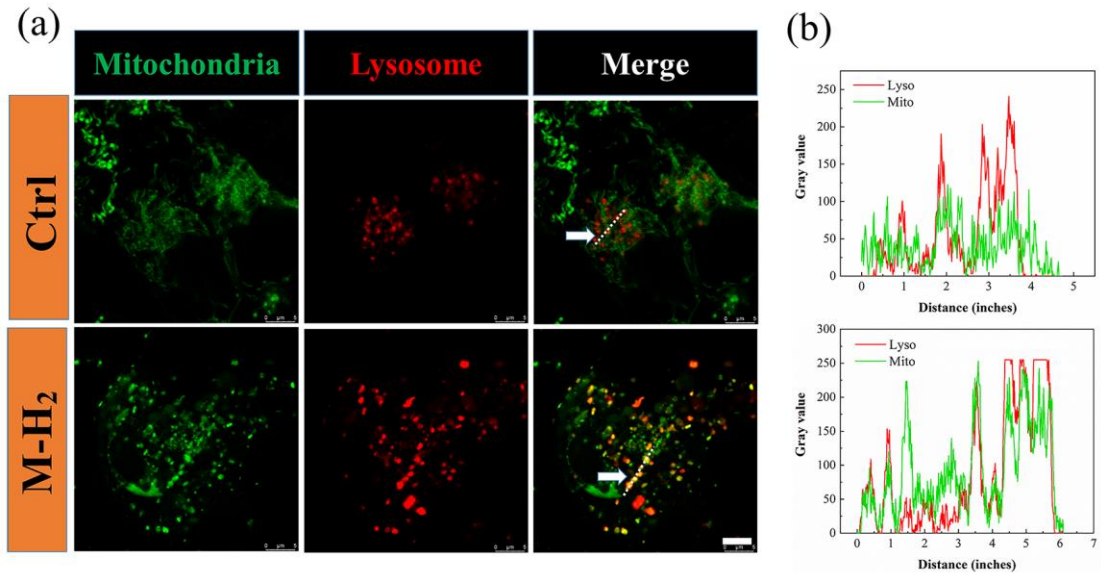

Figure S9 (a) CLSM images to detect the colocalization of mitochondria and lysosome and the scale bar is 5  $\mu\text{m}$ . (b) Colocalization analysis of selected area with a white dotted line.

The volumetric ratio of hydrogen dissolved in tumors to the total hydrogen produced by Mg ( $\eta$ ) is estimated from the Mg plate (exposed surface at 24 mm<sup>2</sup>/mL, for 720 min) *in vitro* immersion test. The  $\eta$  is calculated as follows:

$$n(\text{H}_2\text{-d}) = C_s V_s = 145.5 \times 0.01 = 1.455 \mu\text{M}$$

where  $n(\text{H}_2\text{-d})$  is the mole of the dissolved hydrogen;  $C_s$  is the concentration of dissolved H<sub>2</sub> in PBS solution at 720 min and  $V_s$  is the volume of the PBS solution.

$$n(\text{H}_2\text{-r}) = \frac{PV}{RT} = \frac{101.325 \times 0.00026}{8.314 \times 310.15} = 10.217 \mu\text{M} \text{ (under standard atmosphere pressure)}$$

Where  $n(\text{H}_2\text{-r})$  is the mole of the released hydrogen; P is atmosphere pressure; V is the volume of released hydrogen for 720 min; T is temperature and R is the ideal gas constant.

$$\eta = \frac{n(\text{H}_2\text{-d})}{n(\text{H}_2\text{-r})} \times \% = 1.455 / 10.217 \times \% = 14.24\%$$

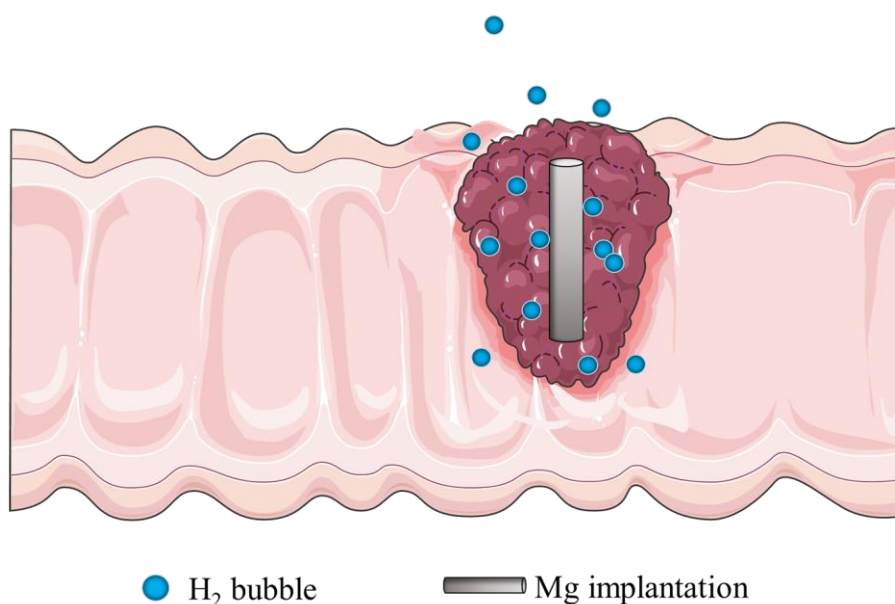

Figure S10 The schematic illustration Mg implantation into colorectal carcinoma to releases H<sub>2</sub> and part of H<sub>2</sub> dissolving in tumors.

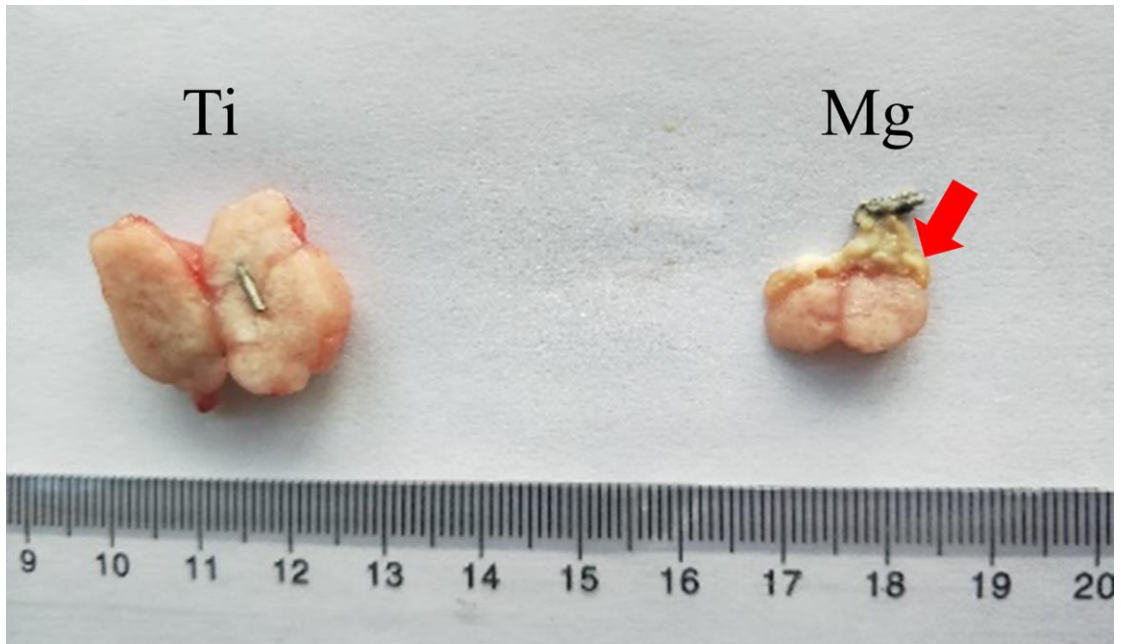

Figure S11 The photograph of tumor tissues inserted by Ti (left) and Mg (right) wires.

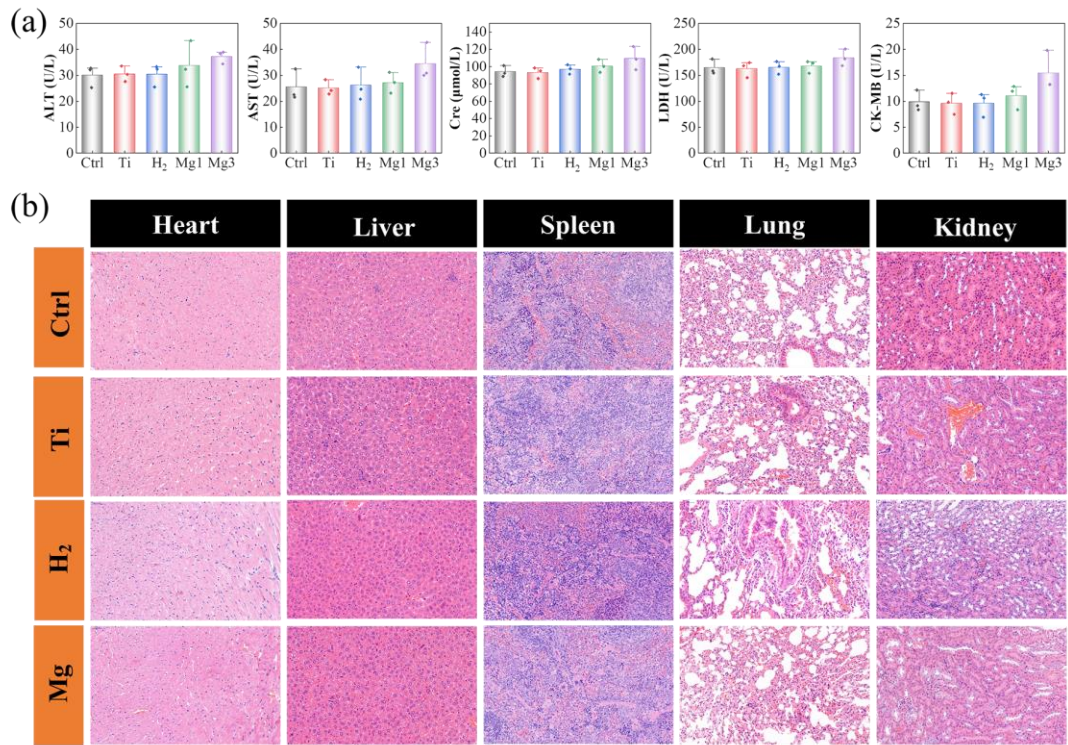

Figure S12 (a) Haematology data of the tumor-bearing mice with different treatments on the 24<sup>th</sup> day. (b) H&E staining of the major organs of mice on day 24th.

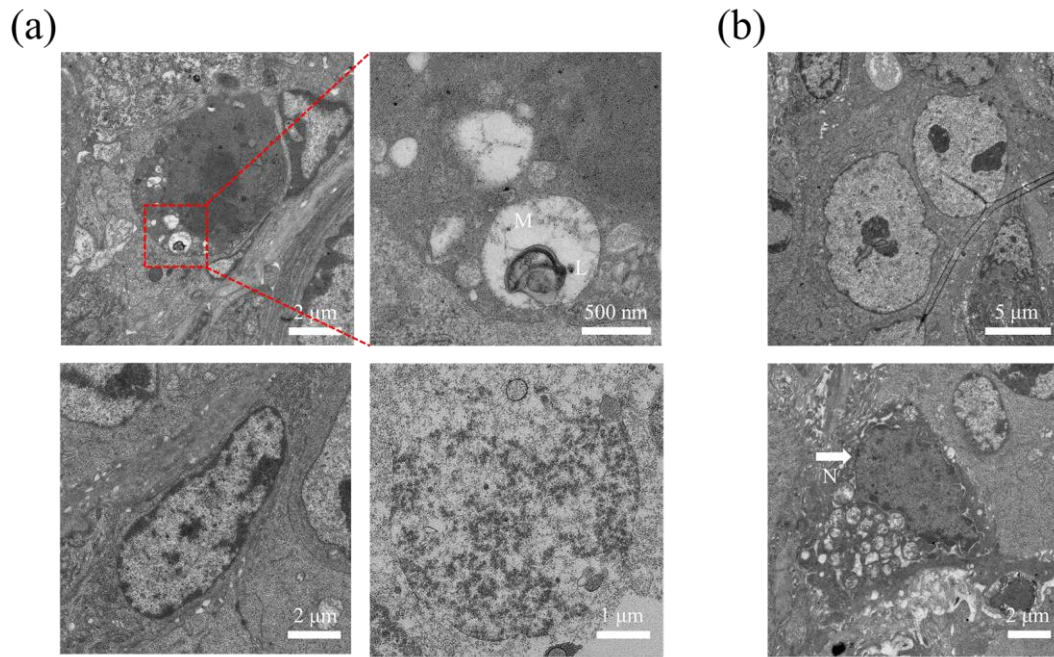

Figure S13 (a) Typical apoptotic features of HCT116 cells in tumor tissues were observed, including swollen and vacuolated mitochondria (top), aggregation of nucleus chromatin on the edge and expansion of nuclear membrane (down left) and apoptotic body (down right); (b) some immune cells were found near Mg wires, including foreign body multinucleated giant cells (FBGCs) (top) and neutrophils cells (down). M, L and N indicate mitochondria, lysosome and neutrophils cells, respectively.



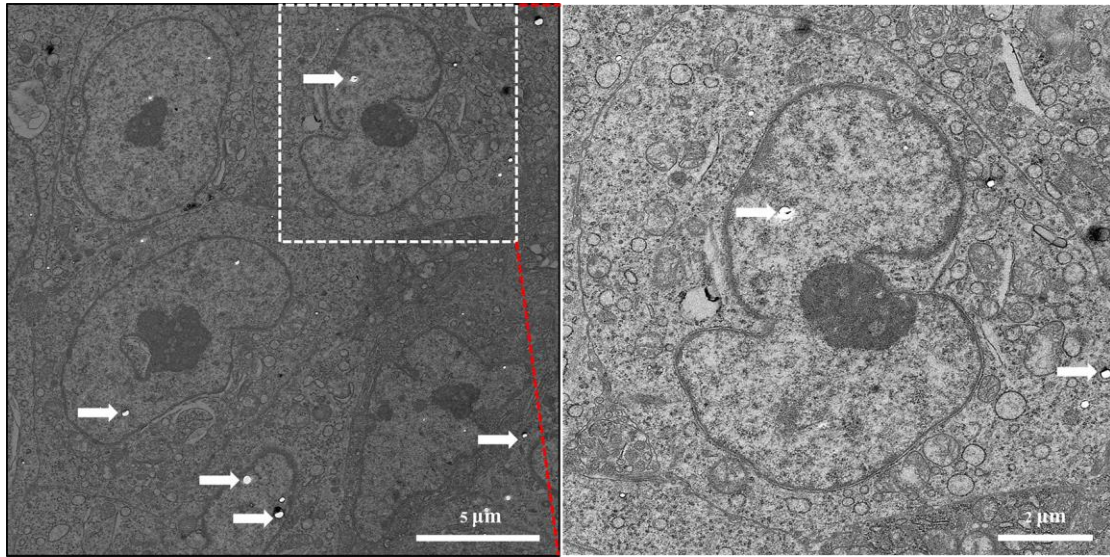

Figure S14 TEM photos of the tumor tissues in **the distant** region of Mg wire.

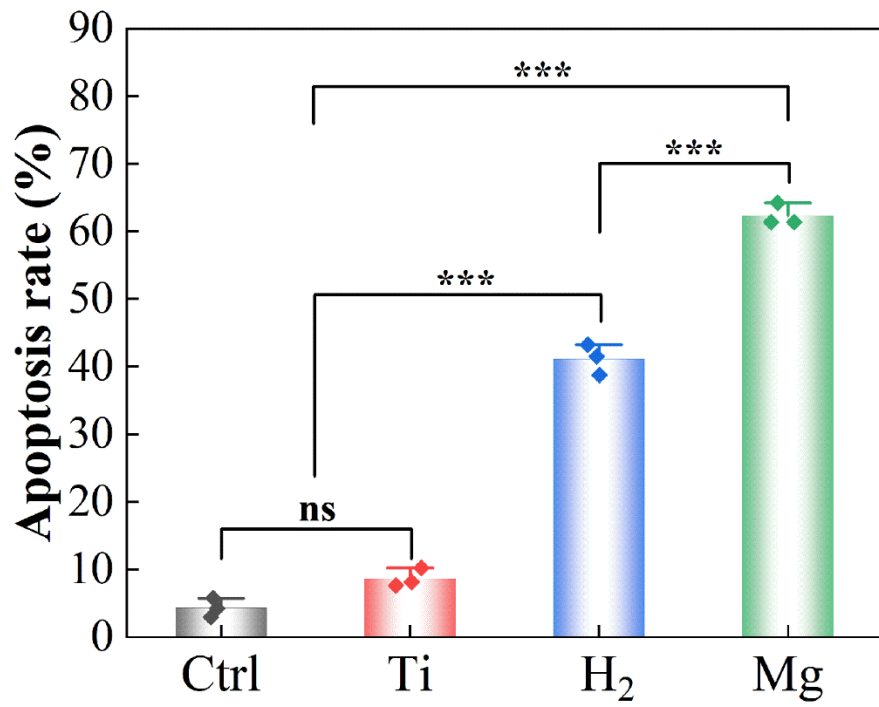

Figure S15 Relative apoptosis rate of the tumor tissue is quantified for each group of mice by TUNEL assay.

Table S1  $E_{\text{corr}}$  and  $I_{\text{corr}}$  values of Mg in PBS solution with pH values of 5.6, 6.5 and 7.4.

| pH value | $E_{\text{corr}}$ (V. vs Ag/AgCl) | $I_{\text{corr}}$ (mA cm <sup>-2</sup> ) |
|----------|-----------------------------------|------------------------------------------|
| 7.4      | $-1.57 \pm 0.11$                  | $6.10 \pm 0.19 \times 10^{-5}$           |
| 6.5      | $-1.86 \pm 0.02$                  | $3.27 \pm 0.39 \times 10^{-4}$           |
| 5.6      | $-1.91 \pm 0.13$                  | $1.54 \pm 0.28 \times 10^{-3}$           |

Table S2 Abbreviations and full names of genes are labeled in the circular visualization of the results of gene-annotation enrichment analysis.

|          |                                                        |          |                                                                        |
|----------|--------------------------------------------------------|----------|------------------------------------------------------------------------|
| IL21R    | interleukin 21 receptor                                | CSF3     | colony stimulating factor 3                                            |
| HLA-DPA1 | Major histocompatibility complex, class II, DP alpha 1 | MPL      | MPL proto-oncogene, thrombopoietin receptor                            |
| FAS      | Fas cell surface death receptor                        | CNTFR    | ciliary neurotrophic factor receptor                                   |
| HLA-DOA  | major histocompatibility complex, class II, DO alpha   | PIK3CG   | phosphatidylinositol-4,5-bisphosphate 3-kinase catalytic subunit gamma |
| SOCS1    | suppressor of cytokine signaling 1                     | GHR      | growth hormone receptor                                                |
| SPRY1    | sprouty RTK signaling antagonist 1                     | IL1A     | interleukin 1 alpha                                                    |
| HLA-DPB1 | major histocompatibility complex, class II, DR beta 1  | HLA-DPA1 | major histocompatibility complex, class II, DP alpha 1                 |
| CRLF2    | cytokine receptor like factor 2                        | OCLN     | occludin                                                               |
| CLDN3    | claudin 3                                              | CLDN23   | claudin 23                                                             |
| MADCAM1  | mucosal vascular addressin cell adhesion molecule 1    | JUN      | Jun proto-oncogene, AP-1 transcription factor subunit                  |
| CLDN1    | claudin 1                                              | JAM2     | junctional adhesion molecule 2                                         |
| CD274    | CD274 molecule                                         | PTGS2    | prostaglandin-endoperoxide synthase 2                                  |
| FCGR2C   | Fc fragment of IgG receptor IIc (gene/pseudogene)      | NCF2     | neutrophil cytosolic factor 2                                          |
| CTF1     | cardiotrophin 1                                        | ULBP1    | UL16 binding protein 1                                                 |
| ULBP2    | UL16 binding protein 2                                 | SH2D1B   | SH2 domain containing 1B                                               |
| HLA-DRB1 | major histocompatibility complex, class II, DR beta 1  | HSPA5    | heat shock protein family A (Hsp70) member 5                           |
| GADD45B  | growth arrest and DNA damage inducible beta            | HSPA6    | heat shock protein family A (Hsp70) member 6                           |
| SESN2    | sestrin 2                                              | SERPINE1 | serpin family E member 1                                               |
| CCNG2    | cyclin G2                                              | LTA      | lymphotoxin alpha                                                      |
| CDKN1A   | cyclin dependent kinase inhibitor 1A                   | LAMP3    | lysosomal associated membrane protein 3                                |

|           |                                     |           |                                     |
|-----------|-------------------------------------|-----------|-------------------------------------|
| CD68      | CD68 molecule                       | DNASE2    | deoxyribonuclease 2, lysosomal      |
| NEU1      | neuraminidase 1                     | RAET1L    | retinoic acid early transcript 1L   |
| TNFRSF10C | TNF receptor superfamily member 10c | TNFRSF10B | TNF receptor superfamily member 10b |

## References

- [1] Z. Shi, A. Atrens, An innovative specimen configuration for the study of Mg corrosion, *Corros. Sci.* 53(1) (2011) 226-246.
